# Supplementary material for: Rapid fingerprinting of Rauwolfia species using direct analysis in real time mass spectrometry combined with principal component analysis for their discrimination
Source: Royal Society of Chemistry journal article supplement (doi:10.1039/c5ay01249j), 2015-01-01
Supplement: c5ay01249j1.pdf [file c5ay01249j1.pdf]

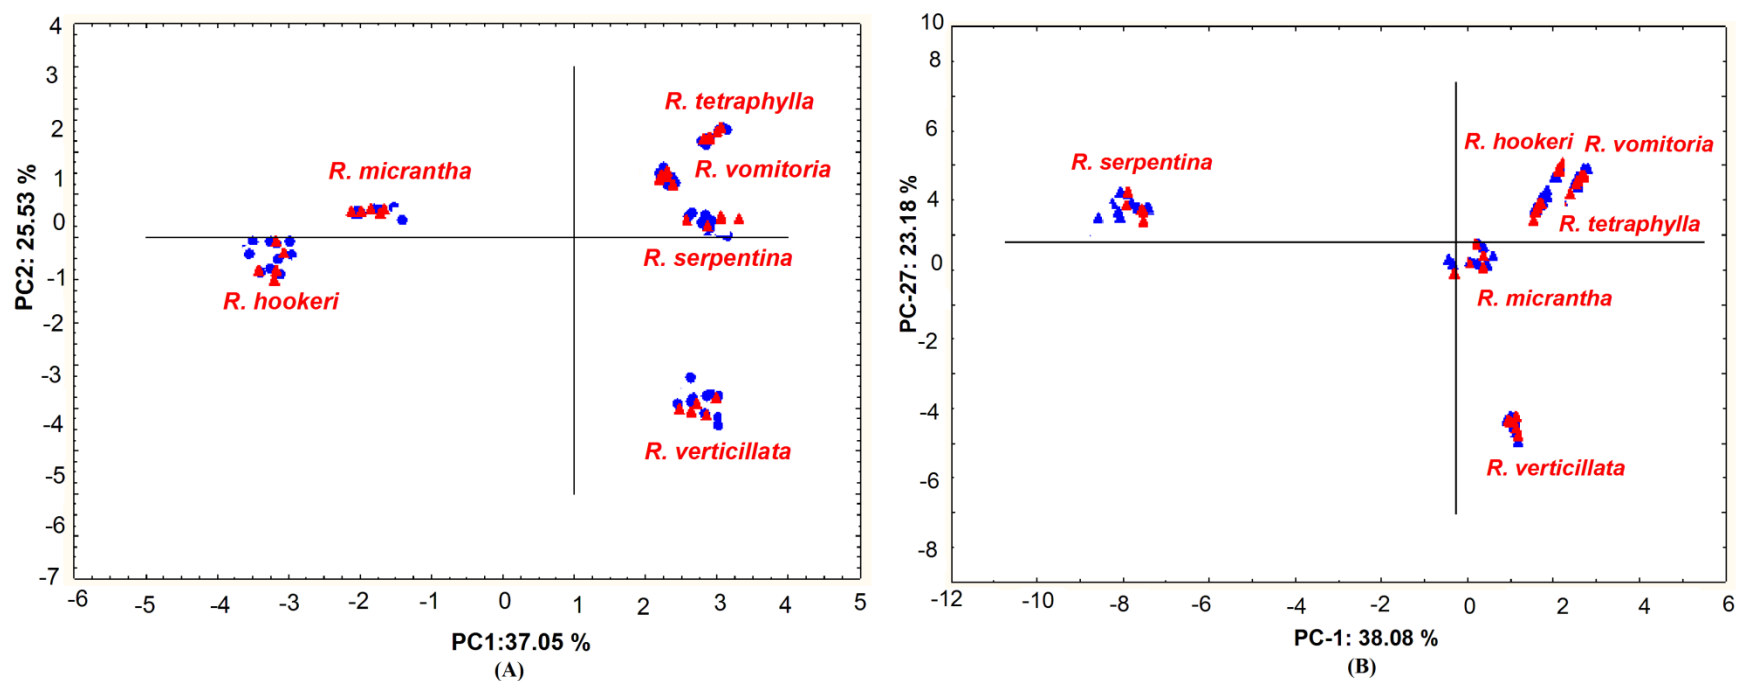

**Fig. S1** PC1 vs. PC2 plot showing distinct discrimination among *R. hookeri*, *R. micrantha*, *R. serpentina*, *R. tetraphylla*, *R. verticillata* and *R. vomitoria* on the basis of total peaks: (A) roots; (B) leaves. Blue and red spots represent training sets and validated respectively.

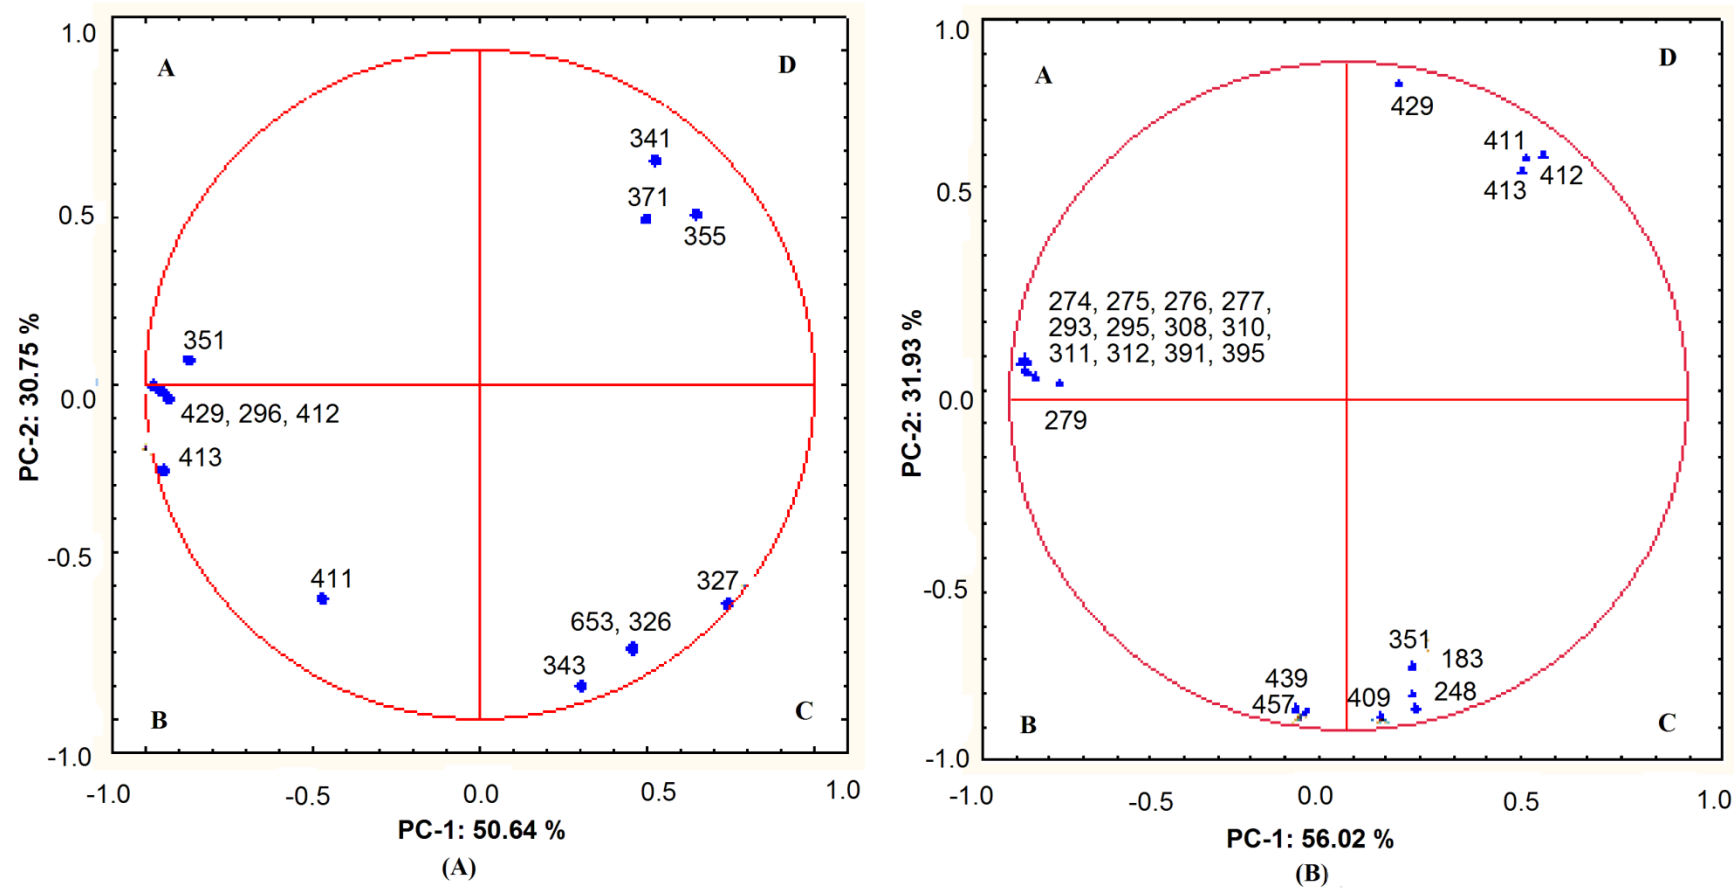

**Fig. S2** PC1 vs. PC2 loading plot showing distribution of variables: (A) roots and (B) leaves.

MS/MS spectra obtained from Agilent 6520 ESI-QTOF-MS/MS system was coupled with an Agilent 1200 HPLC (Agilent technologies, USA)

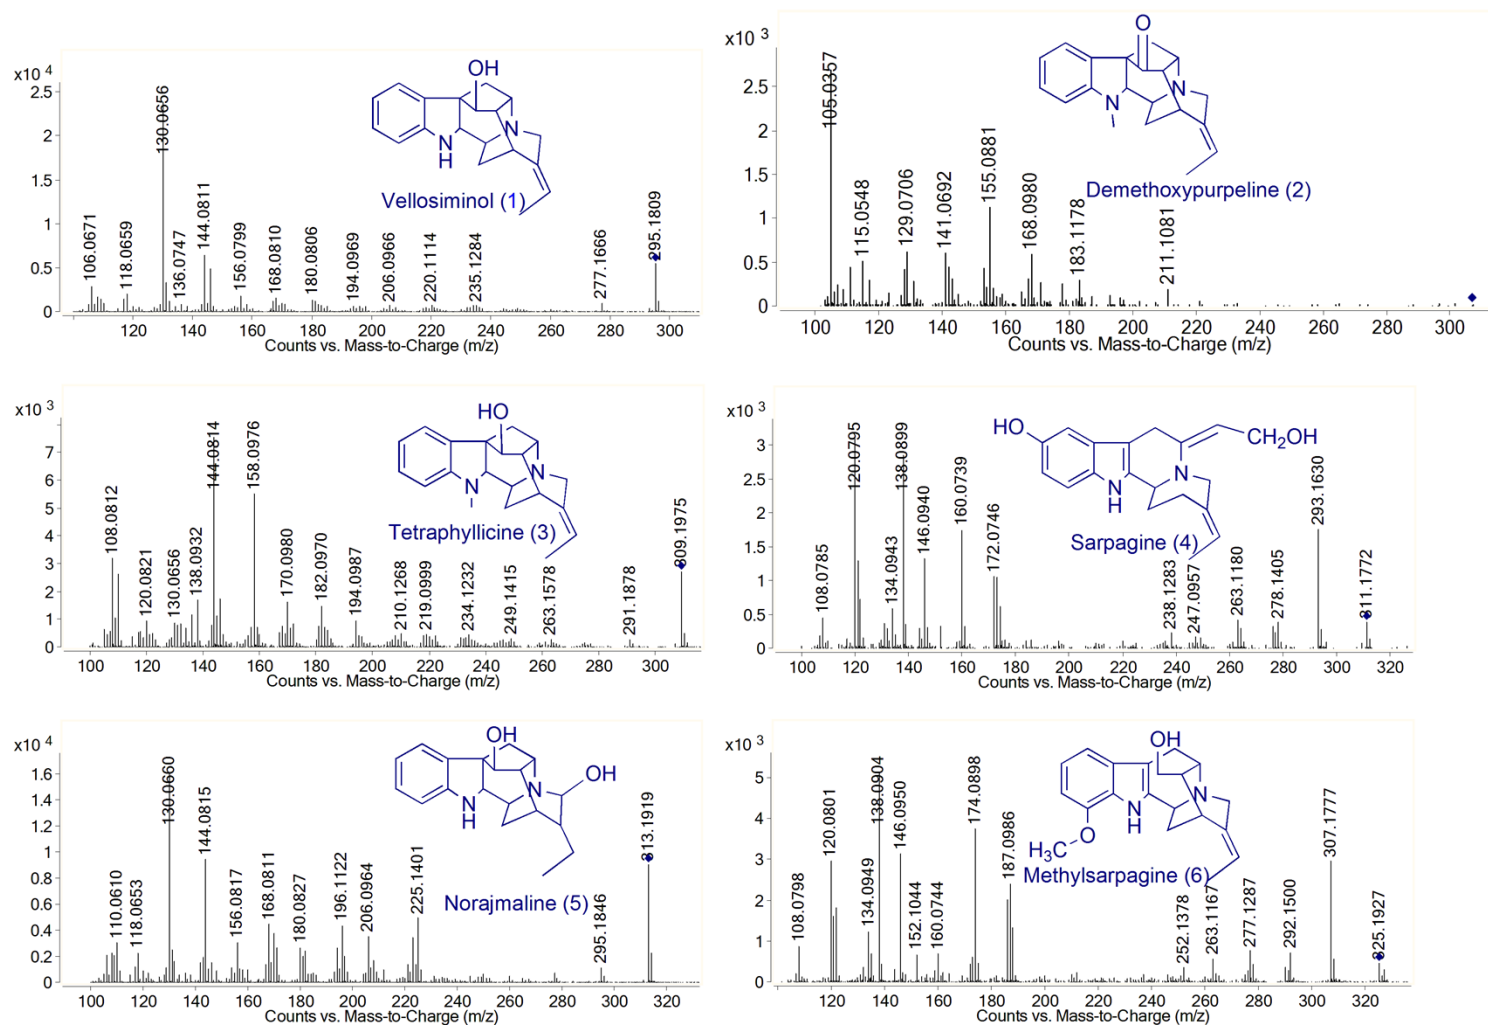

**Fig. S3** HRMS/MS spectra of compounds 1-6

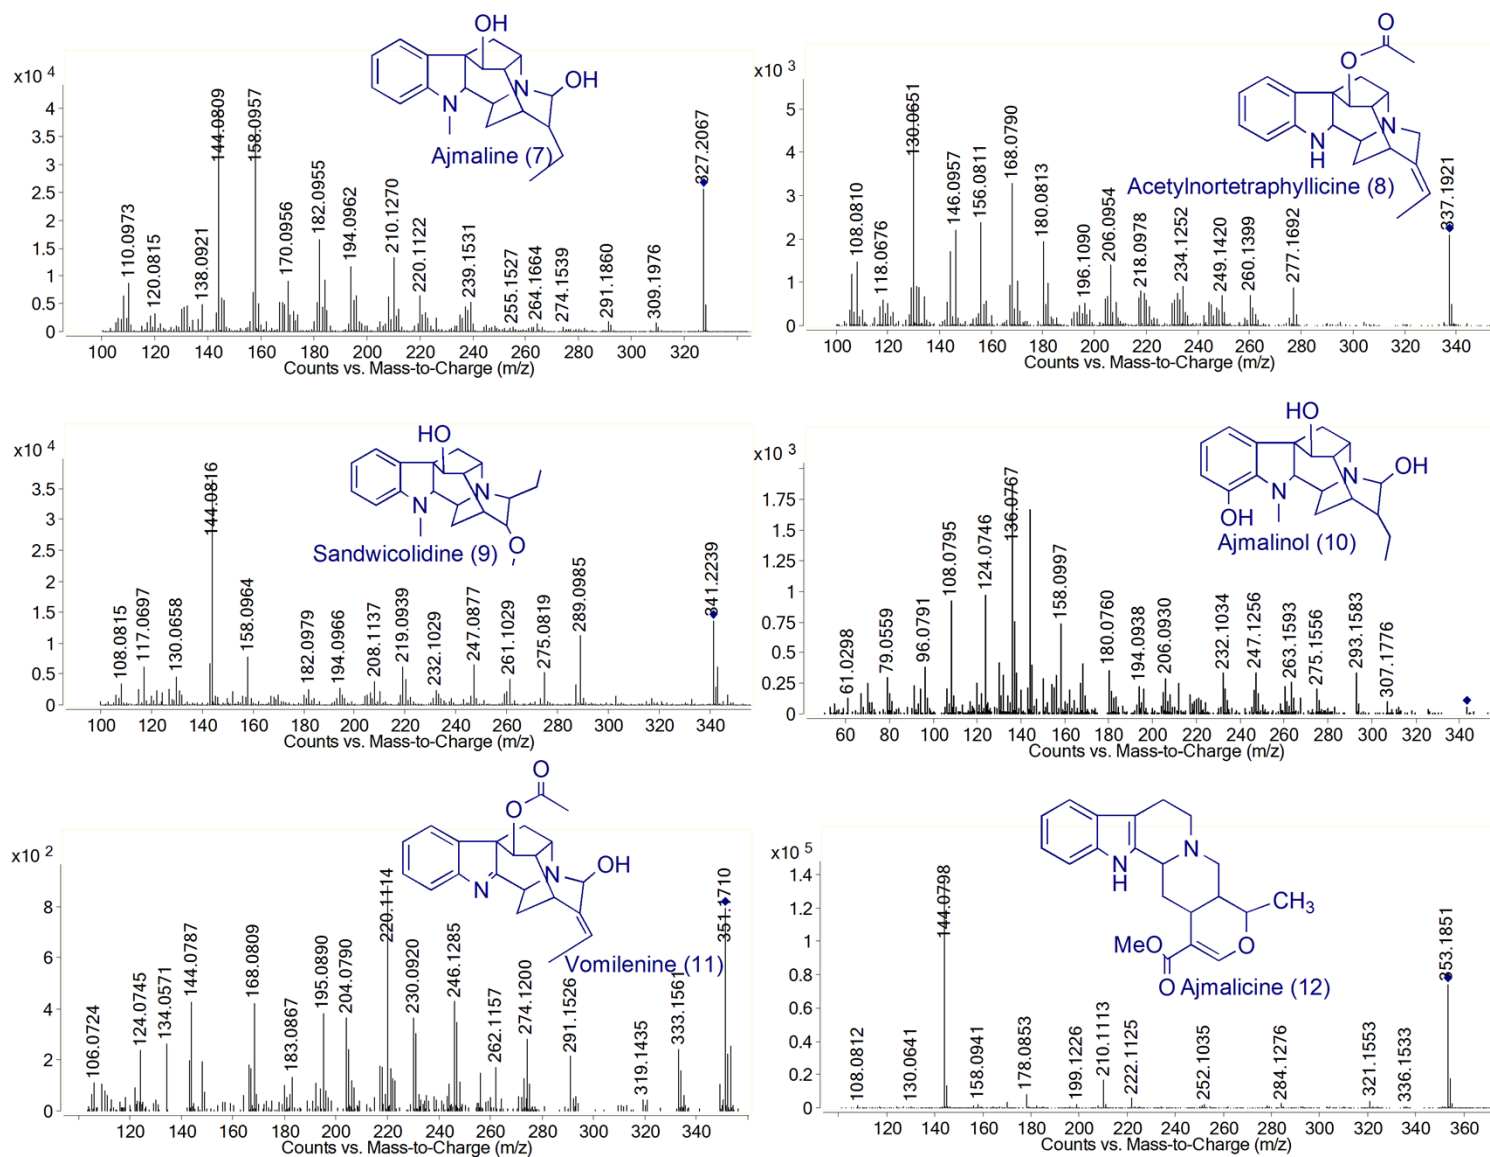

**Fig. S4** HRMS/MS spectra of compounds 7-12

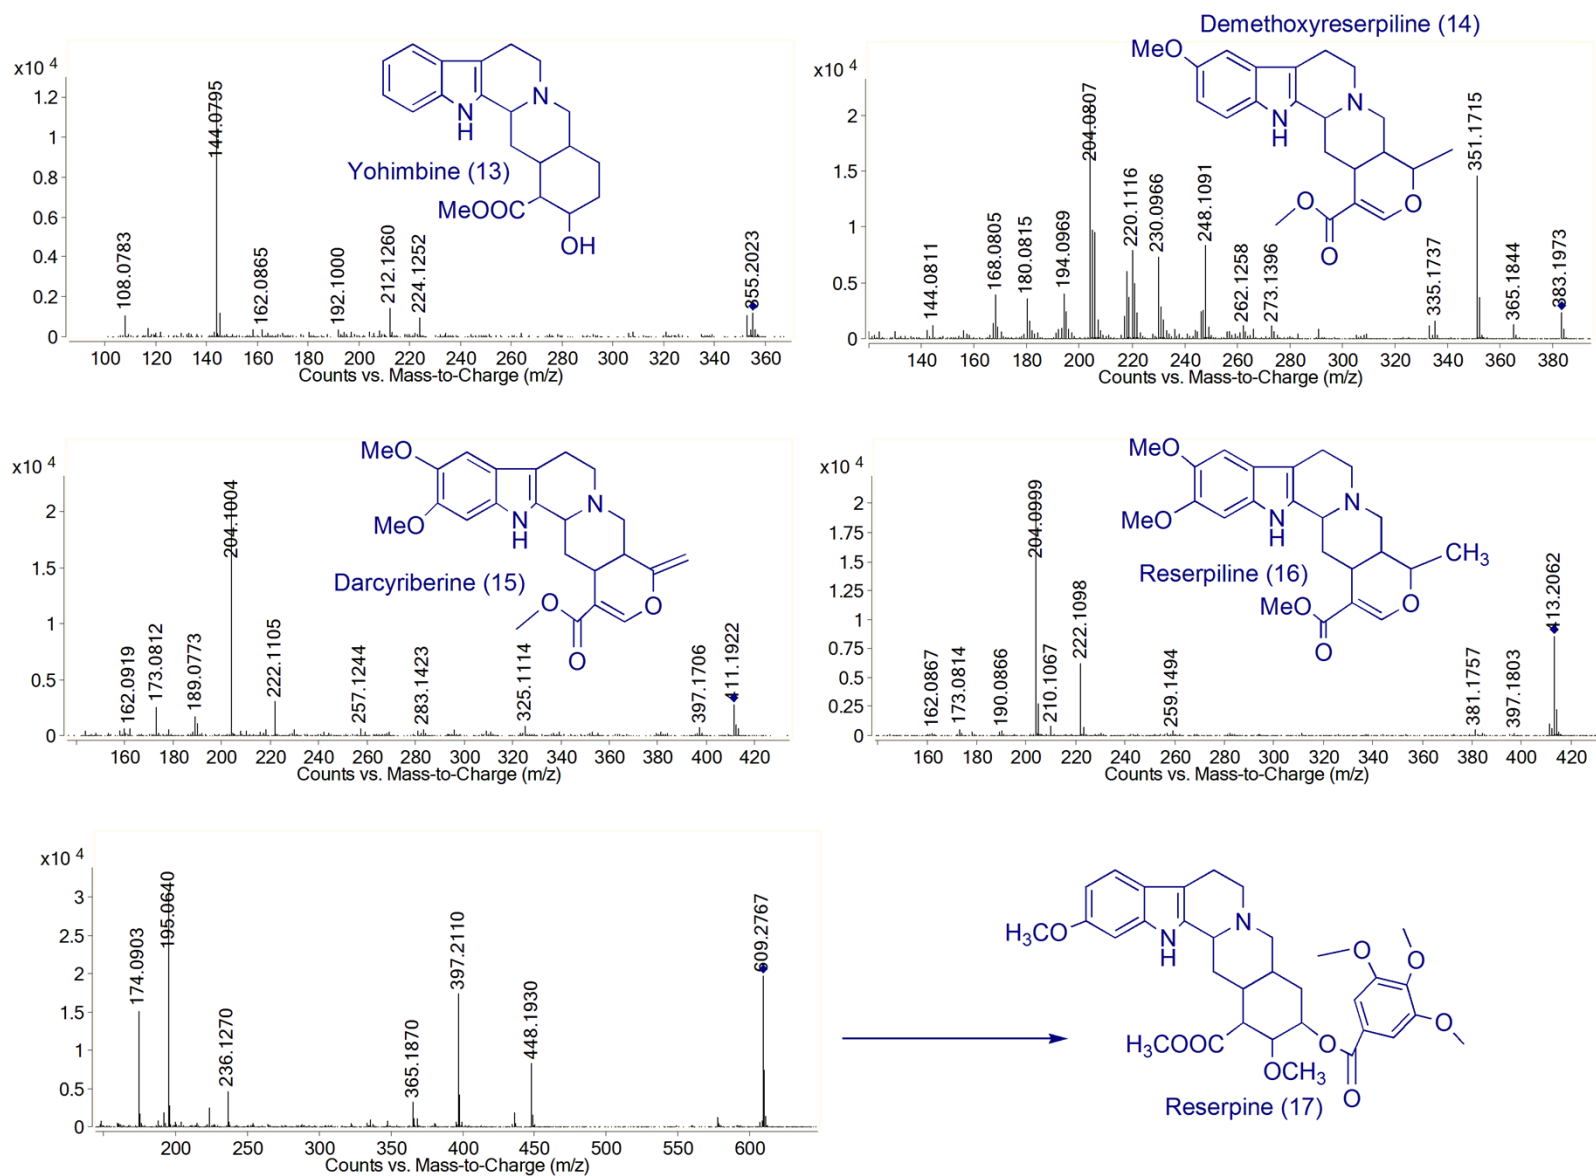

**Fig. S5** HRMS/MS spectra of compounds 13-17
